# Supplementary material for: Real-World Discontinuation and Switching Patterns for Interleukin-Inhibitor Treatments in Patients with Moderate-to-Severe Psoriasis in Japan
Source: PubMed Central journal article supplement — Dermatol Ther (Heidelb). 2023 Nov 29;14(1):99–114. doi: 10.1007/s13555-023-01064-1 (PMC10828160; doi:10.1007/s13555-023-01064-1), 2023-11-29
Supplement: 13555_2023_1064_MOESM1_ESM.pdf [file 13555_2023_1064_MOESM1_ESM.pdf]

## SUPPLEMENTARY MATERIAL

### Real-World Discontinuation and Switching Patterns for Interleukin-Inhibitor Treatments in Patients with Moderate to Severe Psoriasis in Japan

**Authors:** Yayoi Tada<sup>1</sup>, Ahmed M. Soliman<sup>2</sup>, Kanako Ishii<sup>3</sup>, Ryuta Sakuma<sup>3</sup>, Luis Puig<sup>4</sup>, Matthew Davis<sup>5</sup>, Dominic Nunag<sup>5</sup>, Andreas Pinter<sup>6</sup>, Shinichi Imafuku<sup>7</sup>

**Affiliations:** <sup>1</sup>Teikyo University School of Medicine, Tokyo, Japan; <sup>2</sup>AbbVie, Inc., 1 N. Waukegan Road, North Chicago, IL 60064 USA; <sup>3</sup>AbbVie GK, Tokyo, Japan; <sup>4</sup>Department of Dermatology, IIB SANTPAU, Hospital de la Santa Creu i Sant Pau, Universitat Autònoma de Barcelona, Carrer de Sant Quintí, 89, 08041 Barcelona, Spain; <sup>5</sup>Medicus Economics, LLC, Milton, MA USA; <sup>6</sup>Department of Dermatology, Venereology and Allergology, University Hospital Frankfurt, Frankfurt am Main, Germany; <sup>7</sup>Department of Dermatology, Fukuoka University Faculty of Medicine, Fukuoka, Japan.

#### Correspondence:

Name: Ahmed M. Soliman, MS, PhD

Institution: AbbVie Inc.

Address: 1 North Waukegan Road, North Chicago, IL 60064

Phone: 847.938.5475

Email: [ahmed.m.soliman@abbvie.com](mailto:ahmed.m.soliman@abbvie.com)

## Supplemental Figure S1: Discontinuation definition

### Drug X with 28-day treatment period

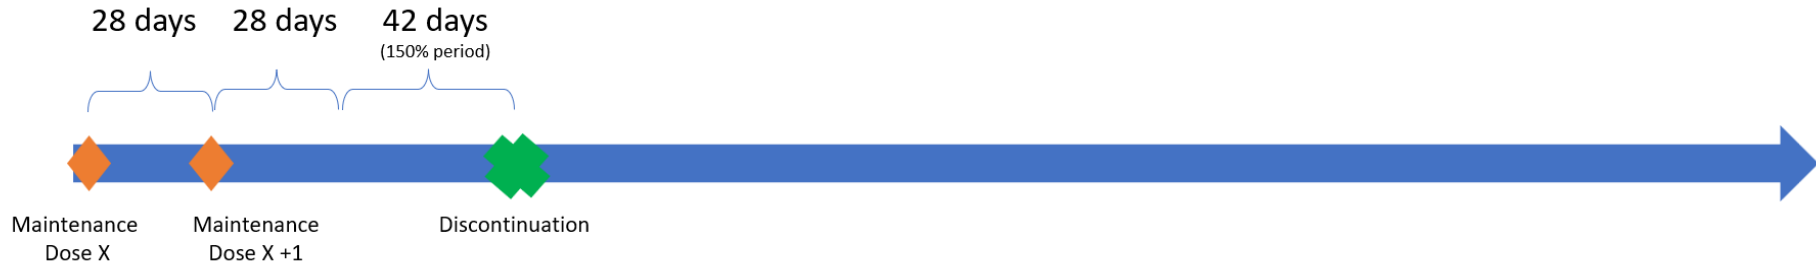

### Drug Y with 84-day treatment period

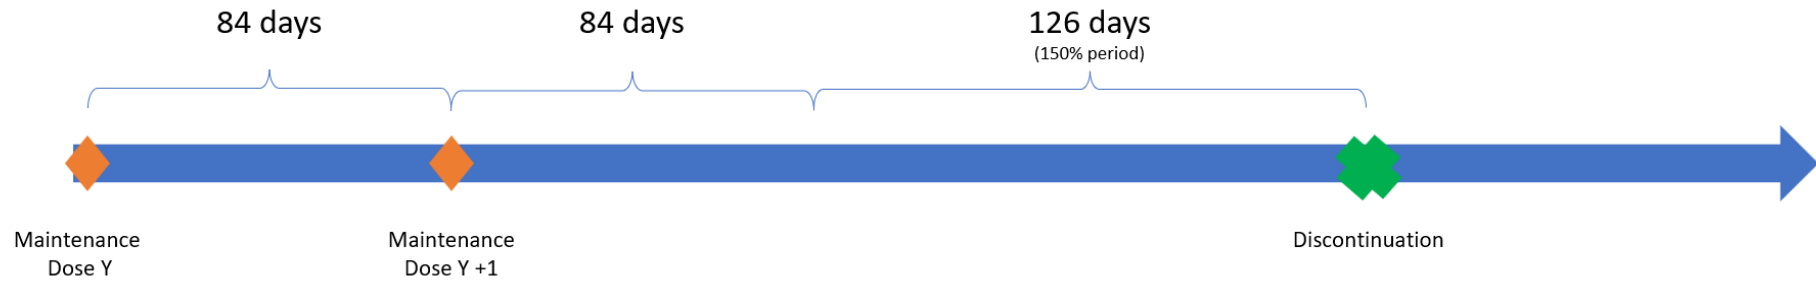

**Supplemental Table S1: Descriptive frequency of treatment switches by treatment<sup>1</sup>**

| Index Treatment   | IL-17 |      | IL-23 |      |
|-------------------|-------|------|-------|------|
|                   | N     | %    | N     | %    |
| <b>Switchers</b>  | 93    | 100% | 54    | 100% |
| <b>Switch to:</b> |       |      |       |      |
| IL-17             | 26    | 28%  | 25    | 46%  |
| IL-23             | 26    | 28%  | 10    | 19%  |
| IL-12/23          | 9     | 10%  | 4     | 7%   |
| TNF               | 32    | 34%  | 15    | 28%  |

**Notes:**

[1] Limited to patients who switch treatment within 12 months following treatment initiation.

*IL = Interleukin; TNF = Tumor necrosis factor;*

**Supplemental Table S2: Sensitivities on permissible gap used to define discontinuation**

| Cohort       |                | 12m Discontinuation<br>60-day Sensitivity <sup>1</sup> |     | 12m Discontinuation<br>180-day Sensitivity <sup>1</sup> |     | 12m Discontinuation<br>365-day Sensitivity <sup>1</sup> |     |
|--------------|----------------|--------------------------------------------------------|-----|---------------------------------------------------------|-----|---------------------------------------------------------|-----|
| Drug         | N <sup>2</sup> | n                                                      | %   | n                                                       | %   | n                                                       | %   |
| brodalumab   | 126            | 49                                                     | 39% | 31                                                      | 25% | 28                                                      | 22% |
| guselkumab   | 233            | 78                                                     | 33% | 62                                                      | 27% | 53                                                      | 23% |
| ixekizumab   | 211            | 68                                                     | 32% | 55                                                      | 26% | 43                                                      | 20% |
| risankizumab | 196            | 31                                                     | 16% | 23                                                      | 12% | 17                                                      | 9%  |
| secukinumab  | 269            | 96                                                     | 36% | 73                                                      | 27% | 63                                                      | 23% |
| ustekinumab  | 225            | 44                                                     | 20% | 36                                                      | 16% | 29                                                      | 13% |

**Notes:**

[1] Discontinuation defined as no claims for specified number of days following the days supply of the last prescription.

[2] Limited to patients with 12 months of eligibility following treatment initiation.

Supplemental Table S3: Covariate estimates from adjusted models<sup>1</sup>

| Variable                                                   | Discontinuation |         | Switching    |         |
|------------------------------------------------------------|-----------------|---------|--------------|---------|
|                                                            | Hazard Ratio    | P-Value | Hazard Ratio | P-Value |
| <b>Demographics</b>                                        |                 |         |              |         |
| <b>Gender (reference: Female)</b>                          |                 |         |              |         |
| Male                                                       | 0.72            | 0.000   | 0.72         | 0.003   |
| <b>Age (reference 65+)</b>                                 |                 |         |              |         |
| 0 - 17, n (%)                                              | 1.94            | 0.126   | 1.25         | 0.732   |
| 18 - 39, n (%)                                             | 1.19            | 0.443   | 1.11         | 0.736   |
| 40 - 64, n (%)                                             | 1.08            | 0.704   | 1.18         | 0.544   |
| <b>Biologic treatment history (reference: Experienced)</b> |                 |         |              |         |
| Interleukin-inhibitor naïve                                | 1.12            | 0.293   | 0.99         | 0.954   |
| <b>Baseline Health</b>                                     |                 |         |              |         |
| <b>Comorbidities</b>                                       |                 |         |              |         |
| Asthma                                                     | 1.34            | 0.025   | 1.03         | 0.853   |
| Chronic obstructive pulmonary disease                      | 1.79            | 0.170   | 1.82         | 0.246   |
| All cancers                                                | 1.26            | 0.047   | 1.18         | 0.272   |
| Chronic liver disease and cirrhosis                        | 0.52            | 0.204   | 0.68         | 0.520   |
| Liver disease                                              | 0.92            | 0.479   | 0.88         | 0.387   |
| Chronic renal disease                                      | 1.07            | 0.804   | 0.72         | 0.430   |
| Acute myocardial infarction                                | 0.47            | 0.219   | 0.47         | 0.312   |
| Other ischemic heart disease                               | 1.07            | 0.692   | 0.84         | 0.461   |
| Cerebrovascular disease                                    | 1.12            | 0.641   | 0.49         | 0.052   |
| Congestive heart failure                                   | 0.81            | 0.437   | 1.53         | 0.184   |
| Hyperlipidemia                                             | 0.97            | 0.763   | 1.05         | 0.714   |
| Hypertension                                               | 1.04            | 0.682   | 1.22         | 0.112   |

|                                       |      |       |      |        |
|---------------------------------------|------|-------|------|--------|
| Peripheral vascular disease           | 0.86 | 0.671 | 0.17 | 0.075  |
| Atherosclerosis                       | 1.11 | 0.818 | 7.60 | 0.052  |
| Sinusitis                             | 0.76 | 0.229 | 0.90 | 0.699  |
| Tuberculosis                          | 0.92 | 0.620 | 1.43 | 0.056  |
| Diabetes mellitus, type 2             | 1.13 | 0.383 | 0.90 | 0.579  |
| Depression                            | 1.12 | 0.479 | 0.97 | 0.871  |
| <b><i>Baseline healthcare use</i></b> |      |       |      |        |
| <b>Baseline charges</b>               |      |       |      |        |
| Outpatient                            | 1.00 | 0.531 | 1.00 | 0.016  |
| Inpatient                             | 1.00 | 0.335 | 1.00 | 0.493  |
| Pharmacy                              | 1.00 | 0.021 | 1.00 | <.0001 |

**Notes:**

[1] Values based on Cox multivariable regression model adjusting for variables shown.

**Supplemental Table S4: Population sensitivity requiring PsO diagnosis codes L40.0 or L40.9**

| Cohort       |                | 12m Discontinuation <sup>1</sup> |     |
|--------------|----------------|----------------------------------|-----|
| Drug         | N <sup>2</sup> | n                                | %   |
| brodalumab   | 118            | 41                               | 35% |
| guselkumab   | 182            | 57                               | 31% |
| ixekizumab   | 190            | 52                               | 27% |
| risankizumab | 187            | 21                               | 11% |
| secukinumab  | 227            | 78                               | 34% |
| ustekinumab  | 212            | 34                               | 16% |

**Notes:**

[1] Discontinuation is defined as not having a prescription for a period equal to 150% of the assumed days supply of the last prescription.

[2] Limited to patients with 12 months of eligibility following treatment initiation.
